# A light tunable differentiation system for the creation and control of consortia in yeast

*Chetan Aditya*<sup>1,2,3</sup>, *François Bertaux*<sup>2,1</sup>, *Gregory Batt*<sup>1,2</sup>\*, *Jakob Ruess*<sup>1,2</sup>\*

1. Inria Paris, 2 rue Simone Iff, 75012 Paris, France

2. Institut Pasteur, 28 rue du Docteur Roux, 75015 Paris, France

3. Université de Paris, 85 Boulevard Saint-Germain, 75006 Paris, France

\* These authors contributed equally to this work.

Correspondence: [gregory.batt@inria.fr](mailto:gregory.batt@inria.fr), [jakob.ruess@inria.fr](mailto:jakob.ruess@inria.fr)

## Abstract

Artificial microbial consortia seek to leverage division-of-labour to optimize function and possess immense potential for bioproduction. Co-culturing approaches, the preferred mode of generating a consortium, remain limited in their ability to give rise to stable consortia having finely tuned compositions. Here, we present an artificial differentiation system in budding yeast capable of generating stable microbial consortia with custom functionalities from a single strain at user-defined composition in space and in time based on optogenetically-driven genetic rewiring. Owing to fast, reproducible, and light-tunable dynamics, our system enables dynamic control of consortia composition in continuous cultures for extended periods. We further demonstrate that our system can be extended in a straightforward manner to give rise to consortia with multiple subpopulations. Our artificial differentiation strategy establishes a novel paradigm for the creation of complex microbial consortia that are simple to implement, precisely controllable, and versatile to use.

## Introduction

The evolutionary transition from single cell to multicellular organisms marked a critical turning point in biology<sup>1</sup>. Such shift relied on optimising fitness and productivity through division of labour and specialization<sup>2,3</sup>. The same principle can be extended to microorganisms living together to form microbial communities or consortia. Engineered microbial consortia hold enormous potential and have been hailed as the next frontier in synthetic biology<sup>4,5</sup>. Proof of concept studies have concretely established applications in bioproduction<sup>6,7</sup>, bioremediation<sup>8,9</sup>, and soil microbiome engineering<sup>10</sup>, paving the way for therapeutic applications using human microbiome engineering<sup>11,12</sup>.

In the context of bioproduction, microbial consortia possess several advantages over traditional monocultures as functional specialization allows metabolic burden to be shared across different species. Diversification thus allows yields to be optimised simply through tuning consortia composition, rather than re-engineering the strain itself<sup>13</sup>. Moreover, by including multiple species, toxic by-products produced by one species can be sequestered and/or metabolised by another, thereby improving the efficiency of the overall process<sup>14</sup>. Microbial consortia are typically generated by culturing two or more species together. Such co-culturing approaches rely on various inter-species interactions to ensure the co-existence of different species like mutualism<sup>15</sup>, emergent cooperation<sup>16</sup>, competitive amensalism<sup>17</sup>, and predation<sup>18</sup>. Despite considerable advances in our ability to engineer microbial consortia<sup>6,8,9,19–21</sup> and in our understanding of community interactions<sup>15,16,18,21,22</sup>, dynamic control of consortium composition remains a key challenge in the field<sup>19</sup>. Typically, stable consortia are based on syntrophic or quorum sensing interactions that, albeit being autonomous, remain critically dependent on cell density, thus limiting the applicability for dynamic control. Additionally, scaling the consortium to include more than two species requires non-trivial considerations that may not lead to stable co-existence<sup>20</sup>. In light of these limitations, an externally controllable differentiation system could be well suited to address this challenge.

In recent years, advances in biological control have come from coupling computers with growing cells carrying the engineered system, made possible by special platforms that integrate biological systems with the computer via a feedback loop<sup>23–27</sup>. The development of optogenetics, i.e. the use of light to trigger cellular processes, has contributed significantly to control applications by increasing the spatiotemporal resolution of the control signal<sup>23,24,28–38</sup>. Control of protein expression using light has been demonstrated both at the population level<sup>23,28,31</sup> and in single cells<sup>30,33,37,39</sup>. Optogenetics has been used to control cellular processes in other contexts, for instance, signalling dynamics<sup>24</sup>, morphogenesis<sup>36</sup>, neuroscience<sup>38</sup>, bioproduction and metabolic engineering<sup>29,35</sup>. However, control of population dynamics using optogenetics in a multispecies environment has not been demonstrated yet.

Here, we present an artificial differentiation system in *S. cerevisiae* capable of generating a microbial consortium composed of functionally different subpopulations emerging from a single population akin to differentiation in multicellular organisms. Concretely, we achieve differentiation into genetically-distinct subpopulations –henceforth referred to as species to

highlight the analogy to natural microbial consortia— via recombination-based genetic rewiring that can be externally controlled via light. We demonstrate that our system shows desirable features including low background activity, unprecedented efficiency in budding yeast, graded response to varying light signals, absence of hysteresis, and dynamics that are fast, predictable, and tunable. The system reaches >99% differentiation after 4h of light stimulation and can be stably maintained at any given intermediate level of differentiation for long periods of time (>48h). Owing to its fast and predictable dynamics, our differentiation system enables rapid and robust bidirectional control of a microbial consortium arising from a single strain at user-defined compositions in continuous cultures for extended periods in dynamic setups. Coupling the system to a growth arrest module allows us to control population growth rates in continuous culture in different physiological contexts. We show that our system can be extended to give rise to complex multispecies microbial consortia. We engineer two differentiation programs that can be used to control the total number of species. Finally, we show that our system allows for spatial structuring of microbial consortia by imprinting patterns in 2-D cultures with high resolution. To the best of our knowledge, this is the first report of light-driven system for control of a microbial consortium.

## Results

### An optogenetic synthetic differentiation system in *S. cerevisiae*

We constructed an optogenetic differentiation system consisting of a blue light inducible Cre recombinase under the control of a constitutively expressed optogenetic transcription factor, EL222<sup>40,41</sup>. In order to test the functionality of the system, we designed a recombination cassette composed of a floxed coding sequence (CDS), coding for a fluorescent reporter (mCerulean) that is transcribed constitutively via a pTDH3 promoter upstream of the first LoxP site. Another CDS, coding for a different fluorescent reporter (mNeonGreen), was added downstream of the second LoxP site (**Figure 1a top, Figure S3.1**).

Prior to differentiation, mCerulean is constitutively expressed and mNeonGreen is not. After light induction, Cre is expressed causing a recombination event leading to the expression of mNeonGreen and loss of mCerulean expression.

### Fast and efficient differentiation in light, low background activity in the dark

In order to evaluate efficiency and background activity, cells harbouring the differentiation system were cultured to exponential phase in batch and then subjected to either blue light or kept in darkness. Samples were taken at regular intervals and passed through the cytometer (**Figure 1a bottom**). We used flow cytometry data to compute the differentiated fraction by applying a threshold on mNeonGreen fluorescence (**Figure 1b**). We observed only a marginal increase in the differentiated fraction after 72h of culture in the dark suggesting low background activity (**Figure 1c, grey inset**). Induction with blue light triggered differentiation. Moreover, the efficiency of the system was unprecedented when compared to existing systems in *S. cerevisiae*, leading to >99 % differentiation after 4h of induction (**Figure 1c, blue inset**) (**Table S2**)<sup>42–45</sup>. The efficiency of our system allows us to achieve high levels of differentiation

with minimal light exposure thus eliminating the risk of phototoxicity (**Supplementary text III, Figure S3.2**).

Dynamics of the recombined fraction could be modulated by varying either light intensity or the frequency of applied light pulses. We note that the differentiated fractions are reminiscent of EL222 inducible fluorescent protein levels for varying light intensities and different frequencies of applied light pulses (**Supplementary Text III, Figure S3.3 & Figure S3.4**)<sup>41</sup>.

To further establish that our system remains functional in different experimental contexts, we cultured cells in a microfluidic chamber and stimulated them periodically via short pulses of light on our microscopy platform<sup>30</sup>. Through regular imaging, cellular fluorescence was used to classify cells as differentiated (**Figure 1d**). Prior to light induction (**Figure 1d, t=0**) less than 2% of the cells were differentiated (n=815, over 8 fields of from 2 independent experiments) and within 8 hours of induction more than 99% of the cells in the field of view had differentiated (**Figure 1d t=6h**). The differentiation dynamics were reproducible (**Figure 1e, Figure S2.2**).

### **Spatial control of differentiation and pattern formation in 2D cultures**

To control population composition in space, we grew cells harbouring the differentiation system to late exponential phase. Cells were then loaded in a  $\mu$ bidi slide and placed under the microscope. We used our microscopy platform equipped with a Digital Micromirror Device (DMD) to periodically shine blue light in the shape of different patterns (**Figure S6.1**). Cells were illuminated with a given pattern for 1s every 3 minutes during 1h. Following this, cells were kept in darkness for an hour prior to imaging. We observed that accurate patterns of differentiated cells emerged (**Figure 1f**). Some recombination was present outside of the provided pattern but these cells had differentiated prior to the start of experiment as evidenced by their mNeonGreen fluorescence levels and a lack of mCerulean fluorescence. We conclude that our optogenetic differentiation system enables precise spatial control of differentiation suggesting that it is a practical tool to generate spatially structured heterogeneous microbial communities composed of functionally distinct subpopulations.

### **Characterization of the system and development of a predictive model**

To characterize the differentiation behaviour, cells were cultured continuously in exponential phase in our LED equipped custom turbidostat platform<sup>28</sup> and induced with different light inputs (**Figure 2a**). Sampling from the culture and flow cytometry measurements were automated (Methods). We observed that, by modulating duration of light pulses (**Figure 2a top**), the system could be regulated to reach intermediate levels of differentiation that were stable over time (>48h, **Figure 2b**), showing that we can stably maintain microbial consortium at different compositions (**Figure 2c**). Moreover, these results reveal an interesting dichotomy of our system: it is capable of eliciting a graded response to different stimuli at the population level as well as a differential response to the same stimulus at the single cell level (**Figure 2c & Figure 1d**).

Next, we wondered if hysteresis is present in our system given repeated stimuli. To gauge the extent to which hysteresis affects differentiation dynamics, we induced cultures with repeated pulses at various interpulse durations (**Figure 2a bottom**). If hysteresis were present, we would expect smaller population fractions to recombine with subsequent pulses compared to the first one. The response was reproducible with each pulse resulting in the same differentiated fraction regardless of prior exposure to light (**Figure 2e**) (up to small reactor-to-reactor variability). Furthermore, we investigated if time-separated, repeated pulses of a given total duration would result in a higher differentiation fraction compared to a single continuous pulse of same duration. We found that continuous light resulted in the same differentiation fractions as discrete pulses for the same total duration of induction (**Figure 2f**).

To be able to predict the differentiated population fraction for a given light input, we developed an ordinary differential equations (ODE) model with a single parameter, the differentiation rate (**Supplementary text IIIb**). This model was fitted to two datasets of steady state differentiation fractions post induction with mutually exclusive single pulses. Both fits captured observed behaviours well and resulted in similar estimates for the differentiation rate (**Figure 2d**). A full description of the model as well as our fitting strategy are presented in the Supplementary text IIIb. We also used the model to predict differentiation dynamics emerging from additional light input sequences and found that model predictions were in good agreement with observed data (**Figure 2g**). We conclude that the differentiation dynamics of our system is predictable and can be captured by a simple ODE model.

### **Robust dynamic control of heterogeneous synthetic communities emerging from a single strain**

Having established that our differentiation system exhibits fast and predictable dynamics, we investigated if we could employ it to control consortia composition at user-defined levels in a dynamic setting. We contrived an experimental setup in which two reactors were coupled such that the output of one reactor was connected to the input of the other to be able to dynamically control the population composition despite the absence of growth rate differences between differentiated and non-differentiated cells. The first reactor was kept in the dark as a ‘reservoir’ for non-differentiated cells and the second ‘control’ reactor was exposed to light signals to maintain the culture at a target set point for the differentiated fraction. Cytometry samples were taken every hour to observe the state of the control reactor and adjust the control signal (**Figure 3a**). Cultures in both the reservoir and control reactors were maintained at constant cell densities (**Supplementary text V**). Since there was a constant flux of non-differentiated cells from the reservoir to the control reactor, we adjusted the ODE model accordingly.

Using a model predictive control (MPC) framework<sup>28</sup> along with the modified ODE model (**Supplementary text V, Figure S5.1**), we attempted to maintain user-defined consortia composition (differentiation fractions) in the control reactor. The framework consisted of sampling cells from the control reactor at regular intervals, performing online data analysis to estimate the state of the system (fraction of differentiated cells), and updating the light signal to maintain the fraction of differentiated cells at the desired set point (**Supplementary text V**). We were able to control the population compositions in the control reactor and maintain them

for extended periods (up to 96h) (**Figure 3b**) for different target set points ranging from 10% to 80% of differentiated cells. The response was quick and the desired population fractions were reached within approximately 6h of starting the control. Additionally, our setup enabled us to dynamically modulate the population composition in both directions i.e. increase or decrease differentiated cells in the population from a given level. Concretely, we targeted two cultures to 40% and 80% differentiated cells in the population, respectively and changed the set points after 60h to 80% and 40%, respectively (**Figure 3c**). The control reactor required active control and lost the desired population composition in the absence of an appropriate light signal.

To eliminate the need for a reservoir of non-differentiated cells, we sought a strategy that would allow the non-differentiated fraction to be replenished over time (non-differentiated cells enrich in absence of light signal). To this end, we coupled our system to a growth arrest module such that cells **growth arrest upon differentiation** (GAuDi), forcing them to be outcompeted by the non-differentiated cohort after a single exposure to light.

To achieve the coupling, we hijacked the mating factor pathway in *S. cerevisiae* by overexpressing a FAR1 variant after differentiation<sup>46</sup>. FAR1, a CDK inhibitor, is the downstream effector of the mating factor growth arrest and arrests the cells in G1-S transition by blocking the interaction between CDC28 and G1 cyclins<sup>47,48</sup>. Briefly, differentiated cells express ATAF1, an orthogonal transcription factor<sup>49</sup>, that, in turn, drives the overexpression of the FAR1 variant. A positive feedback loop on ATAF1 TF leading to higher expression of the FAR1 variant was necessary to obtain effective growth arrest upon differentiation. This came at the cost of higher leakage in the dark. The complete construction of this strain is depicted in **Figure S4a**.

We characterized the GAuDi strain under the microscope and in continuous cultures (**Supplementary text IV, Figure S4.2 & S4.4**) and concluded that our approach allowed us to optogenetically induce growth arrest (**Figure 4b, 4c**) and replenish the non-differentiated fraction in self-contained configuration after transient light induction (**Figure 4b, Figure S4.3**). We observed that under the microscope, growth arrest was complete, and no cell divisions were detected upon differentiation for 15h. Similarly, in presence of continuous light, the growth rate in liquid cultures decreased dramatically ( $<0.04 \text{ h}^{-1}$ ) (**Figure S4.2**). In the turbidostat, we observed that the cultures under continuous light escaped the growth arrest 15-20h post differentiation. We establish by targeted genome sequencing and culture in selective media that the escape is linked to loss of the integrative cassette (**Figure S4.2**). We also observed a subpopulation that possessed neither green nor red fluorescence and were deemed dead. We adapted the ODE model to account for growth arrest and extended it to include cell death and escape. We assumed that differentiated cells, in addition to growing significantly slower, die and escape from the growth arrest at definite rates. The culture growth rate is then given by a weighted average of the growth rates of individual species and is equal to the dilution rate of the reactor at constant cell density. The model was fitted to dynamical data from an experiment with a non-trivial light signal (**Figure 4b, Supplementary text IV**). The fitted model was validated by comparing model predictions to data collected in four additional experiments in

which cultures were exposed to different light signals (**Figure 4c, Figure S4.4**). We note that the predictive power of the model is limited when the system operates under strong selection pressure, that is, when light is applied over extended durations.

We used this modified ODE model in conjunction with the MPC framework to demonstrate single reactor control of a microbial consortium originating from a single strain. Concretely, exponentially growing GAuDi cells in the turbidostat were exposed to optimized light signals such that the population composition is maintained at user-defined set points. Flow cytometry measurements were taken at regular intervals to track the fraction of differentiated cells (**Figure 4d**). We found that population compositions could be maintained stably for extended periods (up to 48h) (**Figure 4e**). We note that due to genetic stability limitations, it was possible to maintain composition control for longer periods only if the target set point was below 50% differentiation. To the best of our knowledge, this is the first report of dynamic control of population composition in a two species artificial microbial consortium arising from a single strain.

### Generation of complex microbial consortia with multiple subpopulations

Certain applications, particularly in metabolic engineering, might require microbial consortia composed of more than two species. To probe if our system can be used to engineer differentiation programs that allow one to create complex multi-species consortia, we cloned two recombination cassettes (denoted by  $C$  and  $N$ ) in a single strain along with the differentiation system (**Figure 5a**). Cells were cultured and induced in our bioreactor platform with varied pulses repeated every 360 minutes. We found that both sites were approximately equally likely to recombine (asynchronous) (**Figure 5b**) resulting in a 4 species microbial consortium, consisting of double recombined cells ( $\overline{CN}$ ), single recombined cells ( $C\overline{N}$ ,  $\overline{C}N$ ) and the original non-recombined population ( $CN$ ).

Noting that the length of the to-be-excised region plays a critical role in determining the differentiation rate (**Figure S7.1**), we set out to test if this could be exploited to modify the differentiation dynamics. We cloned two recombination cassettes of unequal to-be-excised region ( $C$  and  $N'$ ) along with the differentiation system (**Figure 5c**). We observed that the shorter site recombined first ( $\overline{C}N'$ ) and subsequent pulses led to enrichment of cells with both sites recombined ( $\overline{CN'}$ ) (**Figure 5d**) constituting a sequential differentiation program as opposed to the asynchronous program obtained with to-be-excised regions of equal lengths. We did not observe appreciable levels of species with only the longer site recombined ( $C\overline{N'}$ ) effectively resulting in a three species microbial consortium.

Both versions of the system with two recombination sites remained capable of eliciting a graded response to light. These results demonstrate that our differentiation system can be extended to implement distinct differentiation programs capable of yielding complex consortia composed of a controllable number of species whose prevalence can be optogenetically tuned.

## Discussion

Microbial consortia are expected to be of great utility for biotechnology and hold immense potential for diverse applications<sup>4-11</sup>. However, dynamic control of consortium composition remains relatively unexplored despite being a key challenge in the field<sup>19</sup>. In the present study, we address this challenge with the help of an artificial differentiation system in *S. cerevisiae* capable of generating microbial consortia with custom composition. The system is based on blue light inducible expression of Cre recombinase driven by EL222 from a non-leaky promoter<sup>41</sup>. We characterized the system and established that it possesses several desirable characteristics: fast, reproducible and tunable dynamics, unprecedented efficiency<sup>42-45</sup>, low leakage, and graded response of the population to light (**Figure 1 & 2**). The efficiency of our system allowed us to achieve high levels of differentiation with short transient pulses that eliminate the risk of phototoxicity. Graded population responses to light were critical for achieving control of consortia composition (**Figure 3**). Moreover, the high degree of reproducibility in response to light stimuli allowed us to develop a predictive model that could be used as a basis to precisely control microbial community dynamics. Using the developed model in a model predictive control framework allowed us to achieve bidirectional control of consortia composition in a dynamic setup (**Figure 3**). We note that Klavins and colleagues<sup>53</sup> have developed another differentiation system in yeast, that, in principle at least, could have been used to generate consortia. This system uses a toggle switch to implement memory, and chemical inducers to toggle the switch. We believe that using light as inducer and a DNA implementation of memory allowed us to precisely characterize and select systems with appropriate properties, and drive them with the needed precision to obtain subpopulations in desired proportions.

Several solutions for the stable maintenance of microbial consortia have been proposed recently. In particular, Hasty and colleagues<sup>50,51</sup>, Lu and colleagues<sup>21,52</sup>, and Barnes and colleagues<sup>17</sup> achieved this by using synthetic biology approaches. These authors demonstrate the capacity to maintain co-cultures of several bacterial subpopulations over extended durations. However, none of these approaches succeeded at precisely controlling consortia composition. Moreover, the functioning of these systems relies on the release of signalling molecules in the environment (quorum sensing molecules or bacteriocin) that trigger cell death. The fact that signalling molecules are released by cells creates de facto a strong dependency of the functioning on growing conditions, and notably on the density of cell cultures, an important aspect for bioproduction applications. Lastly, previous designs use elaborate genetic engineering solutions for the molecular implementation of control mechanisms, thus making extension and scaling up of these designs potentially challenging. Moreover, external control by light is inexpensive and compatible with most media composition. In summary, in comparison to previously-existing solutions, our system is simple to implement, quantitatively predictable and actionable, and versatile to use.

Based on the principle of division of labour, microbial consortia have been employed to increase bioproduction by distributing the metabolic burden. Such approaches necessitate functional specialization in the constituent species of consortia. We provided evidence that our design can be implemented in different physiological contexts by coupling it to a growth arrest module (GAuDi system) to allow optogenetic control of growth rate and consortium



composition in self-contained continuous cultures (**Figure 4**). A GAuDi-like system has the potential to facilitate the switch to continuous bioproduction, touted to be the future of bioproduction<sup>54</sup>, by separating growth and production across different sub-populations. In the context of metabolic engineering, our system could serve as a pathway switch, with the potential of compartmentalising metabolic flux in the population. This could be achieved, for instance, by replacing fluorescent proteins by orthogonal TFs that drive entire pathways<sup>55</sup>, leading to division of labour paradigms in consortia engineering and opening up possibilities for population level metabolic engineering.

To show that complex multi-species consortia can be created using our system, we engineered asynchronous or sequential differentiation programs based on multiple recombination cassettes that extended the core system to generate and stably maintain multi-species consortia from a single strain in continuous liquid cultures (**Figure 5**). These programs could be scaled exponentially for applications requiring dynamic control of complex multi-species consortia and do not require intricate genetic circuits spread over multiple populations to ensure stability.

Finally, the capacity to optogenetically control cell fate decisions with spatiotemporal precision has the potential to become a critical tool for dissecting signalling pathways<sup>24</sup> or understanding developmental programs<sup>36</sup>. Here, we showed pattern generation in 2D cultures in a microfluidic plate (**Figure 1, Figure S6.1**). Since we are not restricted to patterns attainable in nature<sup>56</sup>, our system can provide a unique tool to study how equilibria are reached in multispecies ecosystems and elucidate microbial interactions in complex spatially structured communities.

In conclusion, we show that the system has highly desirable characteristics making it a practical tool for robustly generating and maintaining functionally distinct subpopulations both in space and in time.

## Methods

*Cloning:* All plasmids were cloned using the Golden Gate method. The majority of the used parts came from the Yeast Tool Kit (YTK)<sup>57</sup>. New parts, whenever necessary, were generated in the laboratory (DNA synthesis, Phusion PCR). The Golden Gate mixture was transformed via heat shock transformation in thermocompetent *E. coli* cells and plasmids were isolated using standard miniprep kits (Macheray & Nagel, and Qiagen). Sequences of integrative plasmids can be found in Supplementary Table 4.

*Yeast strains:* All strains used in this study are derived from BY4741 [MATa his3 $\Delta$ 1 leu2 $\Delta$ 0 met15 $\Delta$ 0 ura3 $\Delta$ 0]. Cells were transformed with linearized integrative vectors using standard Lithium Acetate transformation. For selection, common auxotrophic markers Uracil, Leucine and Histidine were used. Integrative plasmids carrying *LEU2* and *URA3* were integrated at the endogenous loci while those with *HIS3* were integrated at *HO* locus. Cells were grown in standard defined media (Sigma Aldrich Yeast Nitrogen Base) containing 2% glucose and lacking the respective auxotrophic nutrient during selection in plates (Sigma Aldrich Uracil, Leucine and, Histidine drop-out media supplements). A list of strains used in this study and their genotypes can be found in Supplementary Table 5.

*Cell handling and induction:* Cells were grown overnight (ON) before the day of the experiment by picking a single colony in 50 ml Falcon tubes shaking at 200 rpm at 30°C. Following the ON, a preculture was started by diluting the ON culture 1:50. Depending on the volume of culture required, this was done in either 50ml Falcon tubes (<15 ml) or 250ml flat bottom Erlenmeyer flasks (<150 ml). The preculture was allowed to grow for at least 3 hours (~2 cell generations). Care was taken to do all the experiments in exponential phase. Induction was done

by using RGB led strips (Adafruit NeoPixel Digital RGB LED Strip). Max LED intensity was set at 40 for all experiments unless specified (max led intensity possible is 255). The control was performed via Arduino microcontrollers (Genuino Uno and Mega). Cells were grown in synthetic complete Low Fluorescence media with 2% glucose for all experiments. Light sensitive strains were grown in the dark. All manipulations were performed in the presence of red light.

*Batch culture:* Cells were grown to exponential phase in the dark from ON culture in Falcon tubes shaking at 200 rpm at 30°C in a custom Falcon tube before starting the experiment. Induction was carried out in a custom Falcon tube holder fitted with LED strips.

*Turbidostat:* Turbidostat refers to our custom LED equipped continuous culture platform (Supplementary text I, Figure S1.1)<sup>28</sup>. Experiments done in the turbidostat followed a similar protocol as described above (see section on cell handling). Cells were allowed to grow in the dark until exponential phase and induction was started only after growth rate stabilised. Samples were taken automatically from the turbidostat at regular intervals, diluted 20 times with a pipetting robot and passed through the cytometer. The entire vessel, including pumps and tubing, was autoclaved before each experiment. Unless stated differently, the experiments used a “grow and dilute” program where cells were allowed to grow until OD 0.6 and then diluted to OD 0.4. The growth rate was computed by calculating the slope of linear curve fit to the log of OD data with time. Information regarding the times when the dilutions took place was stored, in addition to the OD and LED status as csv files. Subsequent treatment of the data was done in Python.

*Cytometry and data analysis:* All cytometry measurements were acquired with a Guava EasyCyte BGV 14HT benchtop cytometer. The settings were kept constant for all experiments. For turbidostat experiments 5000 events were recorded for each sample, except for leakage and efficiency experiments (Figure 1c), for which, 50000 events were recorded. No compensation was used during acquisition. Data was deconvolved after acquisition (Figure S1.4 & Figure S1.5). Data was gated using kernel density based methods (Figure S1.3). Python was used for data analysis and visualization (Supplementary text I).

*Microscopy:* Microscopy was performed on the inverted microscopy platform Leica DMI8 S. Live cell imaging was either performed in Ibidi  $\mu$ -slide VI 0.4 (80606) or CellASIC ONIX platform with the microfluidic plates (Y04C) provided by the vendors. The details for the exact excitation and emission spectra of the fluorophores and filters used can be found in Table S1. Unless specified differently, the interframe interval was 6 minutes. During time-lapse live cell imaging, the chamber temperature was maintained at 30°C. We used an in-house software, called MicroMator, for the automated acquisition and cell tracking. Cell segmentation was achieved via SegMator, an in-house neural net based segmentation algorithm<sup>30</sup>. Python was used for data analysis and visualization (Supplementary text II).

*ODE model fitting and parameter estimation:* ODE models were solved using solve\_ivp solver from SciPy.integrate library. Models were fitted using the least square method from SciPy.optimize library. Parameter search for each model was done locally (gradient descent) with multiple initial guesses for parameters and bounds on parameter values between  $10^{-10}$  and 10. To account for the delays, mean squared deviations originating from differentiation system ODE model and GAuDi were calculated after shifting model predictions by 60 minutes, and 120 minutes (differentiated & non-differentiated), 360 minutes (dead) and 300 minutes (growth rate), respectively.

*MPC experiments:* ODE models were used in an MPC framework<sup>28</sup>. The framework consisted of solving the model given a light sequence. This sequence was then optimised using a least square method from SciPy.optimize library to minimize the error between predictions and the target set point starting from an initial state. The optimization for light sequence was done for a time horizon of 5 hours in the form of 10 duty cycles of 30-minute period. Cultures were sampled every hour for two reactor control experiments (Figure 3b & 3c) and every two hours for single reactor control experiments (Figure 3e). The light sequence was updated at each timepoint. To estimate the state of the system, cytometry data was analysed online to determine the state at the time of sampling. This estimate of sampling time state was then used as initial conditions for the model and the current state was estimated by solving the model for a time,  $\tau$ .  $\tau$  stands for a delay, consisting of a sampling delay (time passed

between sample acquisition and finalized data analysis) and an observation delay (time required for enough fluorescent protein to accumulate to pass the differentiation threshold) (Supplementary text V).

## Data, material and code availability

Plasmids, strains, data, and Jupyter notebooks used for data analysis are available from the corresponding authors upon request.

## References

1. Maynard Smith, J. & Szathmary, E. *The major transitions in evolution*. (Oxford University Press, 1997).
2. Ispolatov, I., Ackermann, M. & Doebeli, M. Division of labour and the evolution of multicellularity. *Proc. R. Soc. B Biol. Sci.* **279**, 1768–1776 (2012).
3. Rueffler, C., Hermisson, J. & Wagner, G. P. Evolution of functional specialization and division of labor. *Proc. Natl. Acad. Sci.* **109**, E326–E335 (2012).
4. Brenner, K., You, L. & Arnold, F. H. Engineering microbial consortia: a new frontier in synthetic biology. *Trends Biotechnol.* **26**, 483–489 (2008).
5. Rapp, K. M., Jenkins, J. P. & Betenbaugh, M. J. Partners for life: building microbial consortia for the future. *Curr. Opin. Biotechnol.* **66**, 292–300 (2020).
6. Zhou, K., Qiao, K., Edgar, S. & Stephanopoulos, G. Distributing a metabolic pathway among a microbial consortium enhances production of natural products. *Nat. Biotechnol.* **33**, 377–383 (2015).
7. Li, Z., Wang, X. & Zhang, H. Balancing the non-linear rosmarinic acid biosynthetic pathway by modular co-culture engineering. *Metab. Eng.* **54**, 1–11 (2019).
8. Zhuang, W.-Q. *et al.* Incomplete Wood-Ljungdahl pathway facilitates one-carbon metabolism in organohalide-respiring *Dehalococcoides mccartyi*. *Proc. Natl. Acad. Sci.* **111**, 6419–6424 (2014).
9. Zhang, X. *et al.* Bioremediation of petroleum hydrocarbons by alkali-salt-tolerant microbial consortia and their community profiles. *J. Chem. Technol. Biotechnol.* **96**, 809–817 (2021).
10. Panke-Buisse, K., Poole, A. C., Goodrich, J. K., Ley, R. E. & Kao-Kniffin, J. Selection on soil microbiomes reveals reproducible impacts on plant function. *ISME J.* **9**, 980–989 (2015).
11. Inda, M. E., Broset, E., Lu, T. K. & de la Fuente-Nunez, C. Emerging frontiers in microbiome engineering. *Trends Immunol.* **40**, 952–973 (2019).
12. Chen, K. *et al.* A probiotic yeast-based immunotherapy against *Clostridioides difficile* infection. *Sci. Transl. Med.* **12**, (2020).
13. Wu, S. G., He, L., Wang, Q. & Tang, Y. J. An ancient Chinese wisdom for metabolic engineering: Yin-Yang. *Microb. Cell Fact.* **14**, 1–9 (2015).
14. LaSarre, B., McCully, A. L., Lennon, J. T. & McKinlay, J. B. Microbial mutualism dynamics governed by dose-dependent toxicity of cross-fed nutrients. *ISME J.* **11**, 337–348 (2017).
15. Shou, W., Ram, S. & Vilar, J. M. G. Synthetic cooperation in engineered yeast populations. *Proc. Natl. Acad. Sci.* **104**, 1877–1882 (2007).
16. Wintermute, E. H. & Silver, P. A. Emergent cooperation in microbial metabolism. *Mol. Syst. Biol.* **6**, 407 (2010).
17. Fedorec, A. J. H., Karkaria, B. D., Sulu, M. & Barnes, C. P. Single strain control of microbial consortia. *Nat. Commun.* **12**, 1–12 (2021).
18. Balagaddé, F. K. *et al.* A synthetic *Escherichia coli* predator-prey ecosystem. *Mol. Syst. Biol.* **4**, 187 (2008).

19. Roell, G. W. *et al.* Engineering microbial consortia by division of labor. *Microb. Cell Fact.* **18**, 1–11 (2019).
20. Karkaria, B. D., Fedorec, A. J. H. & Barnes, C. P. Automated design of synthetic microbial communities. *Nat. Commun.* **12**, 1–12 (2021).
21. Kong, W., Meldgin, D. R., Collins, J. J. & Lu, T. Designing microbial consortia with defined social interactions. *Nat. Chem. Biol.* **14**, 821–829 (2018).
22. Kyllilis, N., Tuza, Z. A., Stan, G.-B. & Polizzi, K. M. Tools for engineering coordinated system behaviour in synthetic microbial consortia. *Nat. Commun.* **9**, 1–9 (2018).
23. Miliás-Argeitis, A. *et al.* In silico feedback for in vivo regulation of a gene expression circuit. *Nat. Biotechnol.* **29**, 1114–1116 (2011).
24. Toettcher, J. E., Gong, D., Lim, W. A. & Weiner, O. D. Light-based feedback for controlling intracellular signaling dynamics. *Nat. Methods* **8**, 837–839 (2011).
25. Menolascina, F. *et al.* In-vivo real-time control of protein expression from endogenous and synthetic gene networks. *PLoS Comput Biol* **10**, e1003625 (2014).
26. Lugagne, J.-B. *et al.* Balancing a genetic toggle switch by real-time feedback control and periodic forcing. *Nat. Commun.* **8**, 1–8 (2017).
27. Carrasco-López, C., García-Echauri, S. A., Kichuk, T. & Avalos, J. L. Optogenetics and biosensors set the stage for metabolic cybergenetics. *Curr. Opin. Biotechnol.* **65**, 296–309 (2020).
28. Bertaux, F. *et al.* Enhancing multi-bioreactor platforms for automated measurements and reactive experiment control. *bioRxiv* (2020).
29. Lalwani, M. A. *et al.* Optogenetic control of the lac operon for bacterial chemical and protein production. *Nat. Chem. Biol.* **17**, 71–79 (2021).
30. Fox, Z. R. *et al.* MicroMator: Open and Flexible Software for Reactive Microscopy. *bioRxiv* (2021).
31. Olson, E. J., Hartsough, L. A., Landry, B. P., Shroff, R. & Tabor, J. J. Characterizing bacterial gene circuit dynamics with optically programmed gene expression signals. *Nat. Methods* **11**, 449–455 (2014).
32. Miliás-Argeitis, A., Rullan, M., Aoki, S. K., Buchmann, P. & Khammash, M. Automated optogenetic feedback control for precise and robust regulation of gene expression and cell growth. *Nat. Commun.* **7**, 1–11 (2016).
33. Chait, R., Ruess, J., Bergmiller, T., Tkačik, G. & Guet, C. C. Shaping bacterial population behavior through computer-interfaced control of individual cells. *Nat. Commun.* **8**, 1–11 (2017).
34. Rullan, M., Benzinger, D., Schmidt, G. W., Miliás-Argeitis, A. & Khammash, M. An Optogenetic Platform for Real-Time, Single-Cell Interrogation of Stochastic Transcriptional Regulation. *Mol. Cell* **70**, 745–756.e6 (2018).
35. Zhao, E. M. *et al.* Optogenetic regulation of engineered cellular metabolism for microbial chemical production. *Nature* **555**, 683–687 (2018).
36. Johnson, H. E., Djabrayan, N. J. V, Shvartsman, S. Y. & Toettcher, J. E. Optogenetic rescue of a patterning mutant. *Curr. Biol.* **30**, 3414–3424 (2020).
37. Perkins, M. L., Benzinger, D., Arcak, M. & Khammash, M. Cell-in-the-loop pattern formation with optogenetically emulated cell-to-cell signaling. *Nat. Commun.* **11**, 1–10 (2020).
38. Liu, P., Chen, B. & Wang, Z.-W. GABAergic motor neurons bias locomotor decision-making in *C. elegans*. *Nat. Commun.* **11**, 1–19 (2020).
39. Rullan, M., Benzinger, D., Schmidt, G. W., Miliás-Argeitis, A. & Khammash, M. An optogenetic platform for real-time, single-cell interrogation of stochastic transcriptional regulation. *Mol. Cell* **70**, 745–756 (2018).

40. Motta-Mena, L. B. *et al.* An optogenetic gene expression system with rapid activation and deactivation kinetics. *Nat. Chem. Biol.* **10**, 196–202 (2014).
41. Benzinger, D. & Khammash, M. Pulsatile inputs achieve tunable attenuation of gene expression variability and graded multi-gene regulation. *Nat. Commun.* **9**, 1–10 (2018).
42. Taslimi, A. *et al.* Optimized second-generation CRY2-CIB dimerizers and photoactivatable Cre recombinase. *Nat. Chem. Biol.* **12**, 425–430 (2016).
43. Kawano, F., Okazaki, R., Yazawa, M. & Sato, M. A photoactivatable Cre-loxP recombination system for optogenetic genome engineering. *Nat. Chem. Biol.* **12**, 1059–1064 (2016).
44. Hochrein, L., Mitchell, L. A., Schulz, K., Messerschmidt, K. & Mueller-Roeber, B. L-SCRaMbLE as a tool for light-controlled Cre-mediated recombination in yeast. *Nat. Commun.* **9**, 1–10 (2018).
45. Duplus-Bottin, H. *et al.* A single-chain and fast-responding light-inducible Cre recombinase as a novel optogenetic switch. *Elife* **10**, e61268 (2021).
46. Henchoz, S. *et al.* Phosphorylation-and ubiquitin-dependent degradation of the cyclin-dependent kinase inhibitor Far1p in budding yeast. *Genes Dev.* **11**, 3046–3060 (1997).
47. Chang, F. & Herskowitz, I. Identification of a gene necessary for cell cycle arrest by a negative growth factor of yeast: FAR1 is an inhibitor of a G1 cyclin, CLN2. *Cell* **63**, 999–1011 (1990).
48. McKinney, J. D. & Cross, F. R. FAR1 and the G1 phase specificity of cell cycle arrest by mating factor in *Saccharomyces cerevisiae*. *Mol. Cell. Biol.* **15**, 2509–2516 (1995).
49. Naseri, G. *et al.* Plant-derived transcription factors for orthologous regulation of gene expression in the yeast *Saccharomyces cerevisiae*. *ACS Synth. Biol.* **6**, 1742–1756 (2017).
50. Scott, S. R. *et al.* A stabilized microbial ecosystem of self-limiting bacteria using synthetic quorum-regulated lysis. *Nat. Microbiol.* **2**, 1–9 (2017).
51. Miano, A., Liao, M. J. & Hasty, J. Inducible cell-to-cell signaling for tunable dynamics in microbial communities. *Nat. Commun.* **11**, 1–8 (2020).
52. Liu, F. *et al.* Interaction variability shapes succession of synthetic microbial ecosystems. *Nat. Commun.* **11**, 1–13 (2020).
53. Yang, Y., Nemhauser, J. L. & Klavins, E. Synthetic bistability and differentiation in yeast. *ACS Synth. Biol.* **8**, 929–936 (2019).
54. Langer, E. S. & Rader, R. A. Continuous bioprocessing and perfusion: wider adoption coming as bioprocessing matures. *Bioprocess J* **13**, (2014).
55. Naseri, G., Behrend, J., Rieper, L. & Mueller-Roeber, B. COMPASS for rapid combinatorial optimization of biochemical pathways based on artificial transcription factors. *Nat. Commun.* **10**, 1–18 (2019).
56. Basu, S., Gerchman, Y., Collins, C. H., Arnold, F. H. & Weiss, R. A synthetic multicellular system for programmed pattern formation. *Nature* **434**, 1130–1134 (2005).
57. Lee, M. E., DeLoache, W. C., Cervantes, B. & Dueber, J. E. A highly characterized yeast toolkit for modular, multipart assembly. *ACS Synth. Biol.* **4**, 975–986 (2015).

## Acknowledgements

We thank Sebastian Sosa Carrillo for providing plasmid backbones, Steven Fletcher and Achille Fraisse for assistance with the microscope acquisition software, Virgile Andreani for help with model fitting, and Zachary Fox for providing software for image analysis. We thank members of the Batt group, Gael Yvert, and Hyun Youk for conducive discussions. We are grateful to Mustafa Khammash (ETH Zurich), Bernd Mueller-Roeber (University of Potsdam), and Matthias Peter (ETH Zurich) for providing plasmids. C.A. is enrolled in the

Frontières de l'Innovation en Recherche et Education (FIRE) doctoral school hosted by Université de Paris. This work was supported by the H2020 Fet-Open COSY-BIO grant (grant agreement no. 766840), by the Inria grant IPL COSY and by ANR grants CyberCircuits (ANR-18-CE91-0002), MEMIP (ANR-16-CE33-0018), and Cogex (ANR-16-CE12-0025).

## **Author contributions**

C.A. conceived and cloned the biological circuits and performed experiments. C.A. and F.B. did mathematical modelling and analysed data. C.A., J.R. and G.B. wrote the paper with inputs from F.B. J.R. and G.B conceived and supervised the study.

## **Competing interests**

The authors declare no competing interests.

## Figures

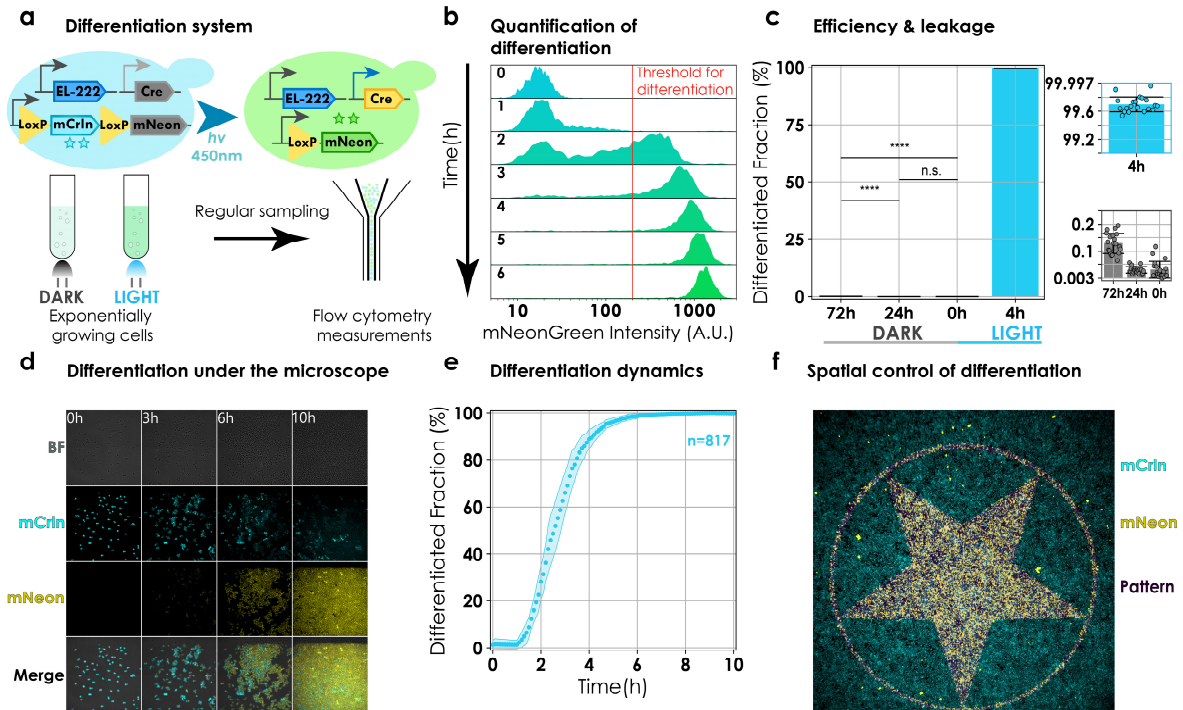

**Figure 1. Design and functional characterization of the differentiation system in liquid and 2-D cultures.**

**a. Design and experimental setup.** Cells constitutively express EL222 optogenetic transcription factor. Blue light triggers expression of Cre and recombination, and a change in fluorescence from mCerulean to mNeonGreen. Cells carrying the differentiation system were cultured to exponential phase in batch. The cultures were induced via LEDs and cytometry measurements were made by sampling at regular intervals.

**b. Quantification of differentiation.** Cells are classified as differentiated if cellular mNeonGreen fluorescence exceeds 200 A.U. (red line). The plot shows the evolution of population mNeonGreen fluorescence as a function of time.

**c. Efficiency and background differentiation.** 20 colonies were picked and cultured in batch for 72h in dark or induced at  $t=0$  for 4h. Measurements were taken at  $t=0$ ,  $t=24h$  and  $t=72h$ . Bars represent means from a single experiment. Errorbars signify standard deviation. Individual data points from colonies are depicted in a scatter plot overlaid on the bar plot (blue & grey inset). Increase in differentiated fraction was not significant (n.s.) after 24h ( $p = 0.41$ ) but became significant at 72h ( $p < 10^{-5}$ ) (black horizontal lines).

**d. Snapshots of cell growth and differentiation under the microscope.** Images during induction from a representative field of view. Cellular fluorescence changes from mCerulean (cyan) to mNeonGreen (yellow).

**e. Differentiation dynamics under the microscope.** Images were segmented and analysed. To be deemed differentiated, median cellular fluorescence had to exceed 300 A.U. mNeonGreen fluorescence. Circles represent mean differentiated fraction over 8 fields of view from two independent experiments. Shaded region shows standard error of mean. The total number of cells at  $t=0$  summed over all fields of view are given by  $n$  ( $n=815$ ).

**f. Imprinting patterns in the population.** Cells were allowed to form a monolayer inside a  $\mu$ bidi slide. Light was shone in a user-defined pattern over the monolayer using a digital mirror device (DMD). mCerulean and mNeonGreen fluorescence were ascribed cyan and yellow colour, respectively. The pattern, in magenta, is overlaid on top of the merge.

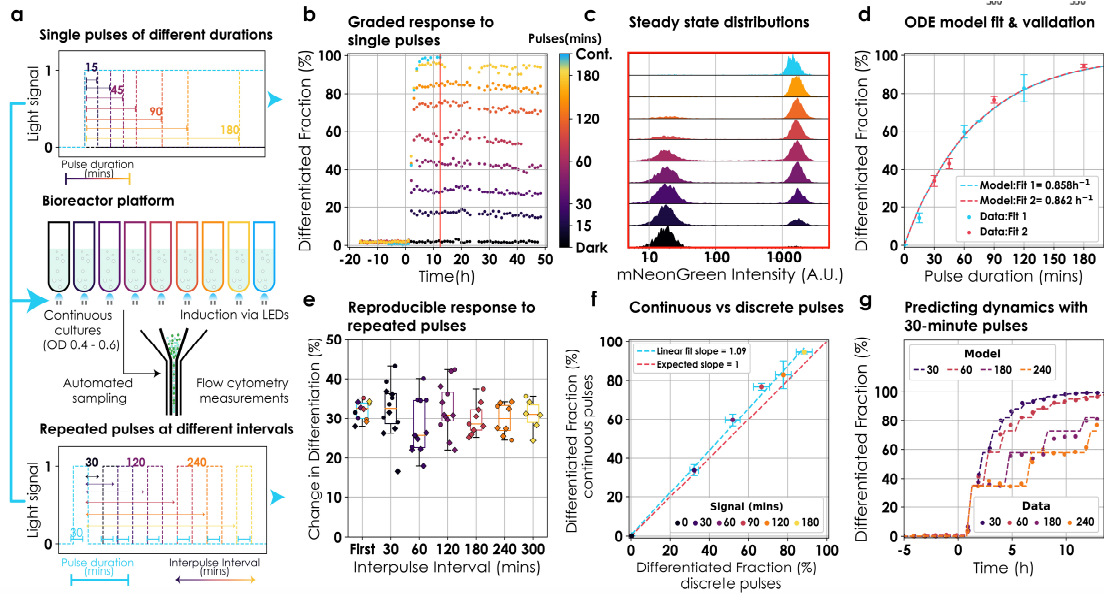

**Figure 2. Characterization and modelling in continuous cultures.**

**a. Bioreactor platform and induction profiles.** Cells were cultured continuously in exponential phase using our bioreactor platform<sup>28</sup>. Cultures were induced via LEDs and flow cytometry measurements were automated. Induction was in the form of either single pulses of different durations (top) or repeated pulses of 30 minutes at different interpulse intervals (bottom).

**b. Differentiation dynamics after single pulse induction.** Cultures were induced at  $t=0h$  with single pulses of light ranging between 15 to 180 minutes (colourbar). Following induction, cultures were kept in the dark for 48h. Circles represent values from a unique experiment.

**c. Tunable population composition.** Snapshots of population mNeonGreen fluorescence after induction with single pulses (b, red line indicates the time of each snapshot).

**d. Model fitting and validation.** An ODE model was fitted to single pulse induction data. Circles represent mean steady state differentiation fractions of three independent experiments (except 75-minute pulse, unique experiment). Error bars signify standard deviation. Blue and red circles were independently used to fit the ODE model (dashed lines) (Supplementary text III).

**e. Reproducible behaviour with repeated pulses.** Cultures were stimulated with 30-minute pulses repeated at different interpulse intervals (30 to 300 minutes). Circles and diamonds represent the change in differentiation fraction by individual pulses from two independent experiments. Data was collated over the two experiments for boxplots. The colour of circles and boxplots reflects interpulse interval. The first pulse of each experiment was used for the blue boxplot.

**f. No observable memory effect.** Data from d & e was used to compare the efficiency of continuous light vs discrete pulses. Circles represent differentiation effected by continuous pulses (y-axis) and equivalent duration of induction in form of 30-minute pulses (x-axis). Errorbars signify standard deviation. A linear fit of the data is given by the blue dashed line and compared to expected linear behaviour in the absence of memory (red line).

**g. Predicting dynamics.** Data (circles) from e was used to check the predictability of the ODE model (dashed lines). Induction started at  $t=0$ . Model predictions were shifted in time to account for observation delay.



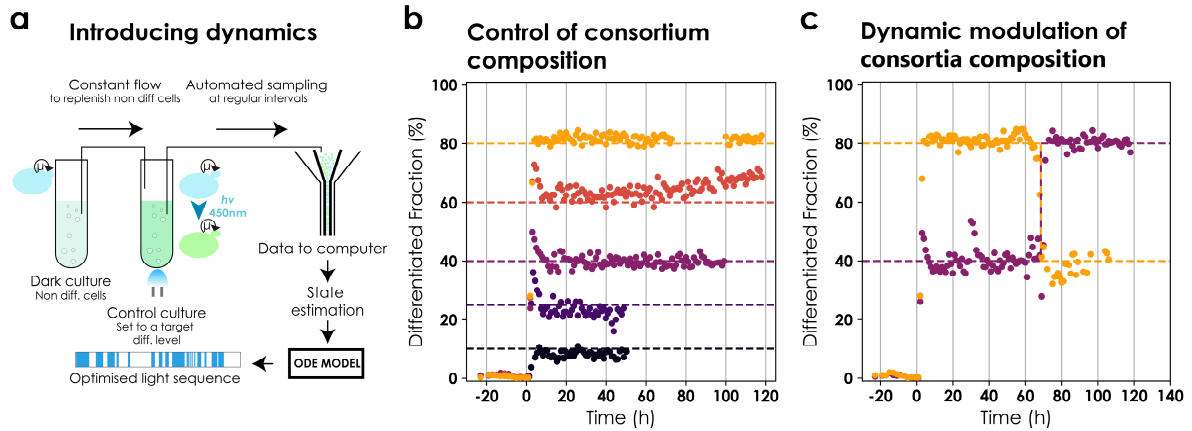

**Figure 3. Dynamic control of population composition in a microbial consortium.**

**a. Setup for two reactor control.** Cells harbouring the original differentiation system were continuously cultured at fixed but different cell densities in two reactors simultaneously. The first reactor was kept in the dark as a reservoir of non-differentiated cells. The output of this vessel was connected to the second ‘control’ reactor. The control culture was set to a target level of differentiation and continuously monitored via automated flow cytometry measurements that were analysed on-line. The system state was estimated from analysed data and sent to the model predictive control (MPC) module. The MPC module provided an optimized light sequence to maintain the culture at the desired set point (**Supplementary Text V**).

**b. Control of consortium composition.** Cultures were targeted to 10-80% differentiation. Control started at  $t=0h$ . Circles signify differentiated fractions. Each colour corresponds to a different control experiment and the dashed line reflects the target set point. Note that the figure is composed of independent experiments of different lengths. Data was removed when the OD, either in the reservoir or the control reactor, could not be maintained at the desired target. Light signals are provided in **Figure S5.2**.

**c. Bidirectional control of consortium composition.** Cultures were targeted to 40% and 80% differentiation. Data is represented as in **b**. The target was changed at  $t=60h$  to 80% and 40%, respectively.

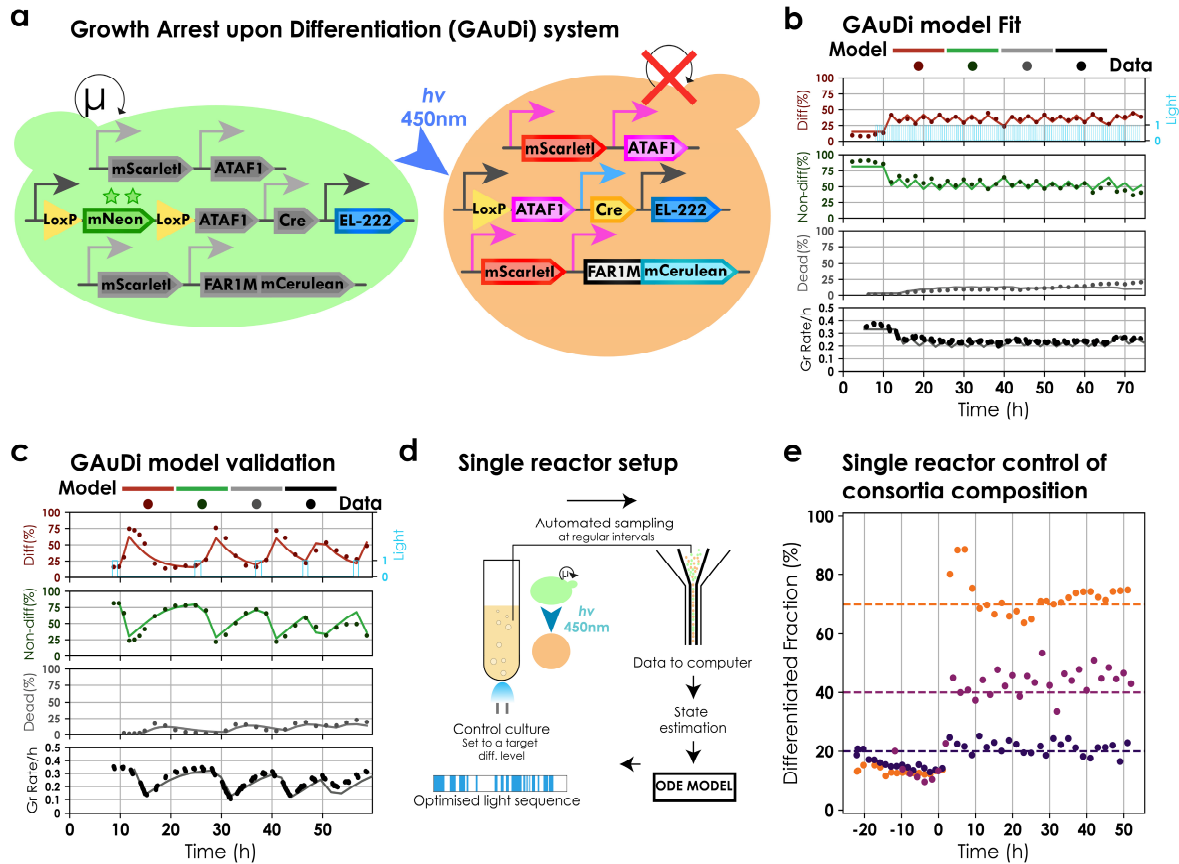

**Figure 4. Characterization and modelling of GAuDi.**

**a. Design.** GAuDi cells constitutively express EL222. Blue light triggers expression of Cre and recombination, and expression of ATAF1 transcription factor. ATAF1 drives the overexpression of a FAR1 mutant (that arrests cells in G1) and mScarlet-I, a “marker” for differentiation. An additional copy of ATAF1 driving itself was necessary for effective arrest.

**b. GAuDi ODE model fit.** An ODE model for GAuDi was developed phenomenologically. The model was fitted to dynamical data with repeated light stimuli of different durations. Solid circles represent data and solid lines signify model predictions. We note that before  $t=0$ , a persistent non-zero differentiation fraction was present possibly due to leakiness in ATAF1 expression in a subset of the population (**Supplementary text IVb**).

**c. GAuDi model validation.** The fitted model was validated by predicting dynamic responses to light signals that were not used for the fit. Data is represented as in **b**. Globally, model predictions were in good agreement with the data (**Figure S4.4**).

**d. Setup for single reactor control.** Cells harbouring the GAuDi system were continuously cultured in exponential phase. The culture was set to a target level of differentiation and continuously monitored via automated flow cytometry measurements that were analysed on-line. The system state was estimated from analysed data and sent to the model predictive control (MPC) module. The MPC module provided an optimized light sequence to maintain the culture at the desired set point (**Supplementary Text V**). Due to presence of dead cells, data was filtered and only live cells were used for subsequent analysis.

**e. Single reactor, single strain control of a microbial consortium.** Cultures were targeted to 25%, 40%, and 70% differentiation. Control started at  $t=0$ h. Circles signify differentiated fractions. Each colour corresponds to a different control experiment and the dashed line reflects the target set point.

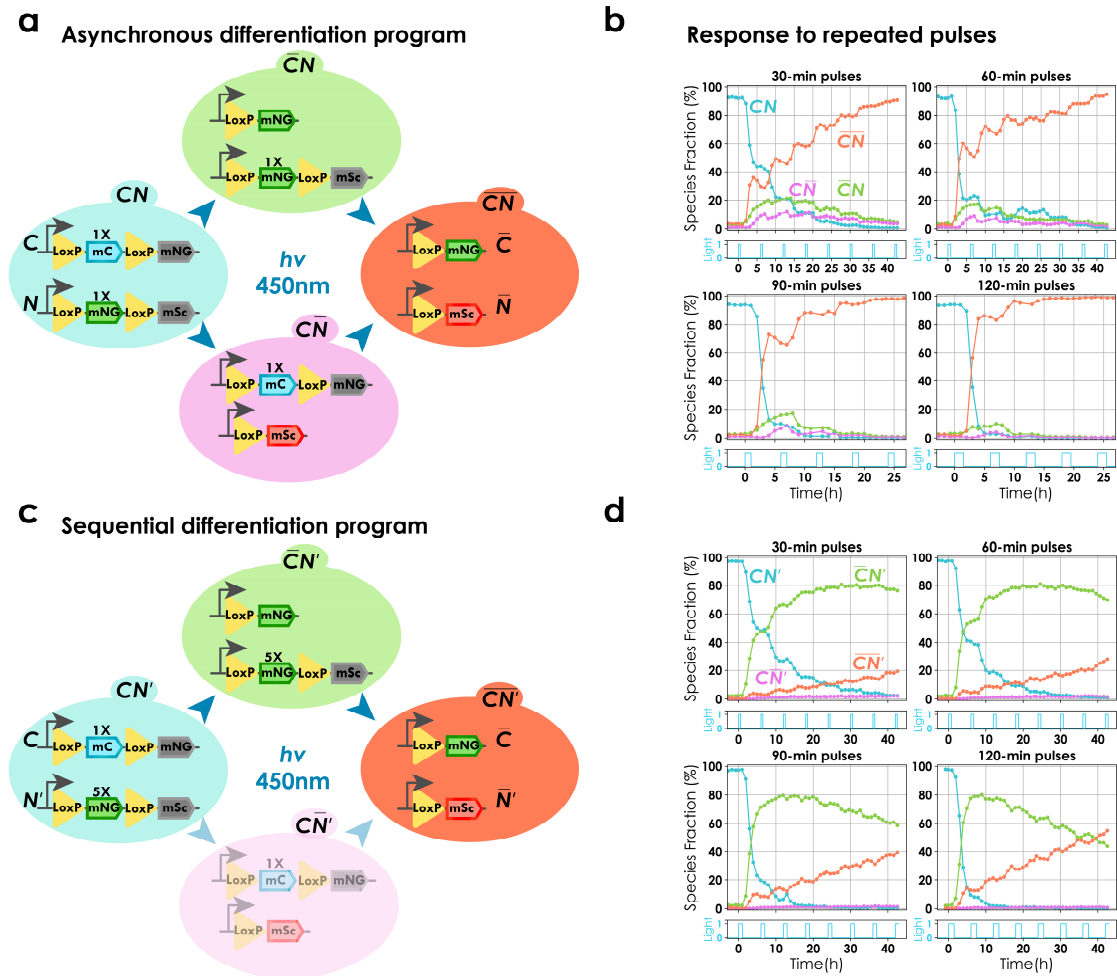

**Figure 5. Engineering differentiation programs for complex consortia with multiple subpopulations.**

**a. Asynchronous differentiation program.** Two recombination cassettes (*C* and *N*) were introduced along with the differentiation system in the same strain. Both cassettes consisted of to-be-excised region of equal lengths (1X of the original system (Figure 1a)). All 4 possible cell types are shown (neither cassettes recombined (*CN*), single cassette recombined ( $\bar{C}N$  &  $C\bar{N}$ ) and both cassettes recombined ( $\bar{C}\bar{N}$ )). Circuits shown in the panel are representational (Figure S7.2).

**b. Response to repeated pulses of different lengths.** Four cultures were induced with repeated light pulses of different durations, 6h apart. Each subplot represents data from a single experiment with unique pulse duration given by cyan subplots (clockwise from top right, 30-minute, 60-minute, 90-minute and 120-minute, respectively). Solid lines show dynamics of prevalence of each subpopulation (blue, purple, red, and orange for *CN*,  $\bar{C}N$ ,  $C\bar{N}$ , and  $\bar{C}\bar{N}$ , respectively). Circles indicate individual time points. Prevalence of each population was calculated using thresholds on mNeonGreen, mScarlet-I and mCerulean fluorescence (Supplementary text VII, Figure S7.3). All four subpopulations could be observed.

**c. Sequential differentiation program.** Two recombination cassettes were introduced along with the differentiation system in the same strain. Relative length of the to-be-excised region of one cassette (*N'*) was 5X longer than the other (*C*). All 4 possible cell types are shown. Notations resemble **a**. Due to increase in the length of to-be-excised-region, the differentiation rate of *N'* was significantly slower than *C* leading to inappreciable prevalence of  $\bar{C}\bar{N}'$  (faded cell type) (Figure S7.2).

**d. Response to repeated pulses of different lengths.** Four cultures were induced with repeated light pulses of different durations, 6h apart. Each subplot represents data from a single experiment with unique pulse duration (clockwise from top right, 30-minute, 60-minute, 90-minute and 120-minute, respectively). Data is represented as in **b**. Three subpopulations could be observed.
